# Supplementary material for: Molecular Signals Controlling the Inhibition of Nodulation by Nitrate in Medicago truncatula
Source: MDPI journal article supplement (doi:10.3390/ijms17071060), 2016-07-02
Supplement: s1 [file s1]

## Supplementary Materials: Molecular Signals Controlling the Inhibition of Nodulation by Nitrate in *Medicago truncatula*

Giel E. van Noorden, Rob Verbeek, Quy Dung Dinh, Jian Jin, Alexandra Green, Jason Liang Pin Ng and Ulrike Mathesius

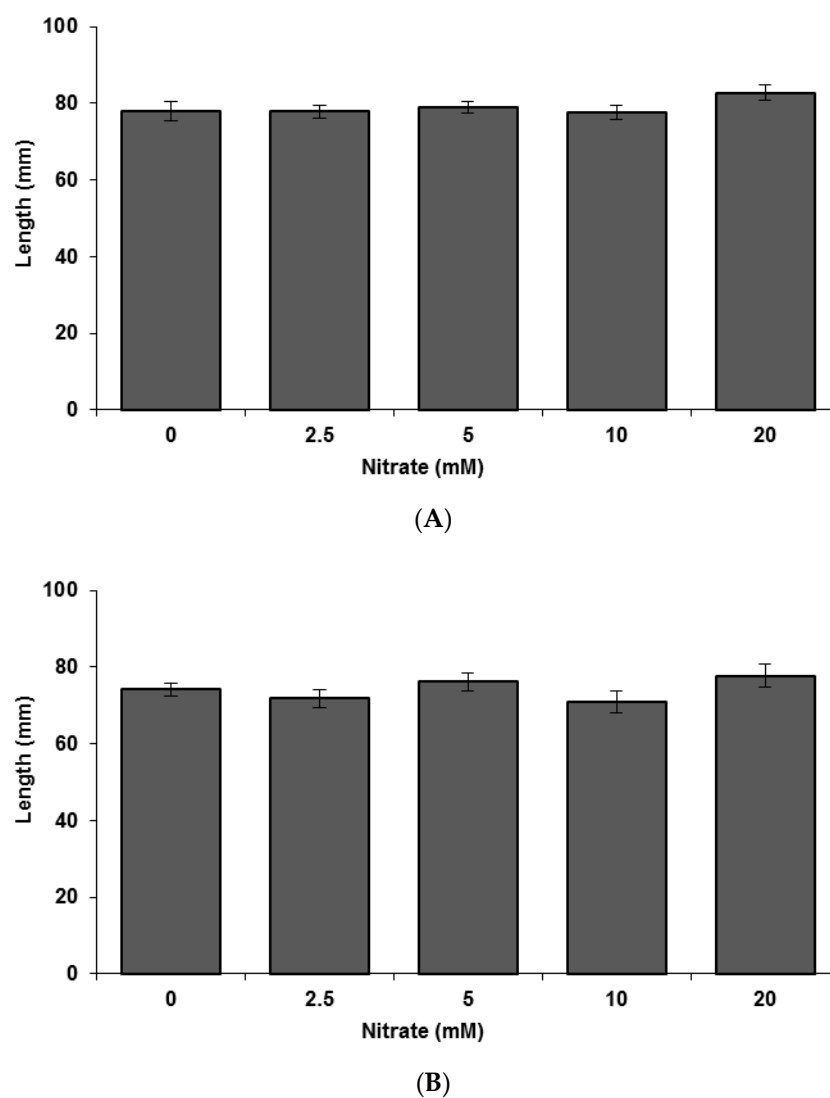

**Figure S1.** Root length of *Medicago truncatula* seedlings grown in the presence nitrate in the growth medium. (A) Uninoculated roots; (B) Roots inoculated with *S. meliloti* strain 1021. There were no significant differences in root length in response to nitrate ( $p > 0.05$ ; one-way ANOVA).

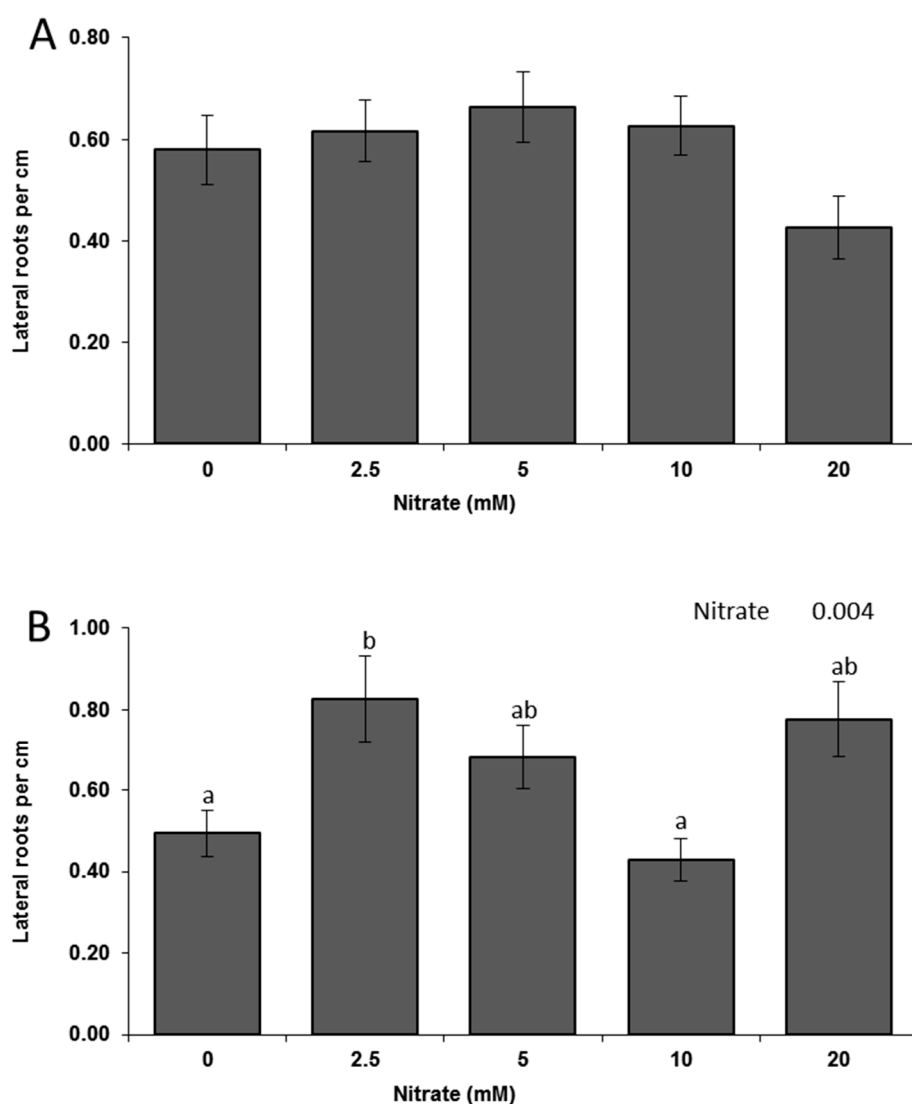

**Figure S2.** Lateral root density of *Medicago truncatula* seedlings grown in the presence nitrate in the growth medium. (A) Uninoculated roots; (B) Roots inoculated with *S. meliloti* strain 1021. There were no significant differences in root length in response to nitrate in the uninoculated roots, but a significant effect ( $p < 0.005$ ) in the inoculated roots (one-way ANOVA). Treatments labelled with different lower case letters differ significantly at  $p < 0.05$ .

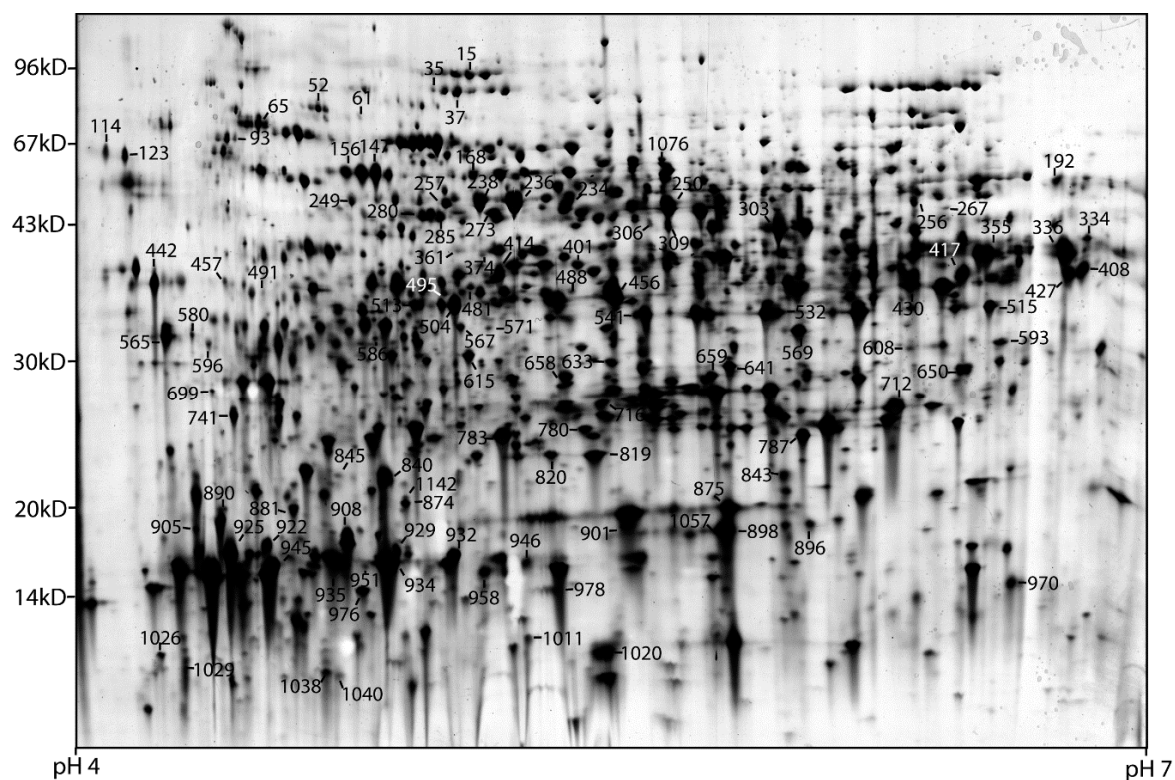

**Figure S3.** Proteome reference map. The gel shows the silver-stained reference gel used for matching of gel images. Proteins were resolved between approximately 10 and 100 kDa between pIs of 4 and 7. Differentially displayed proteins identified in this study are numbered. The numbers refer to proteins listed in Tables S2–S4.

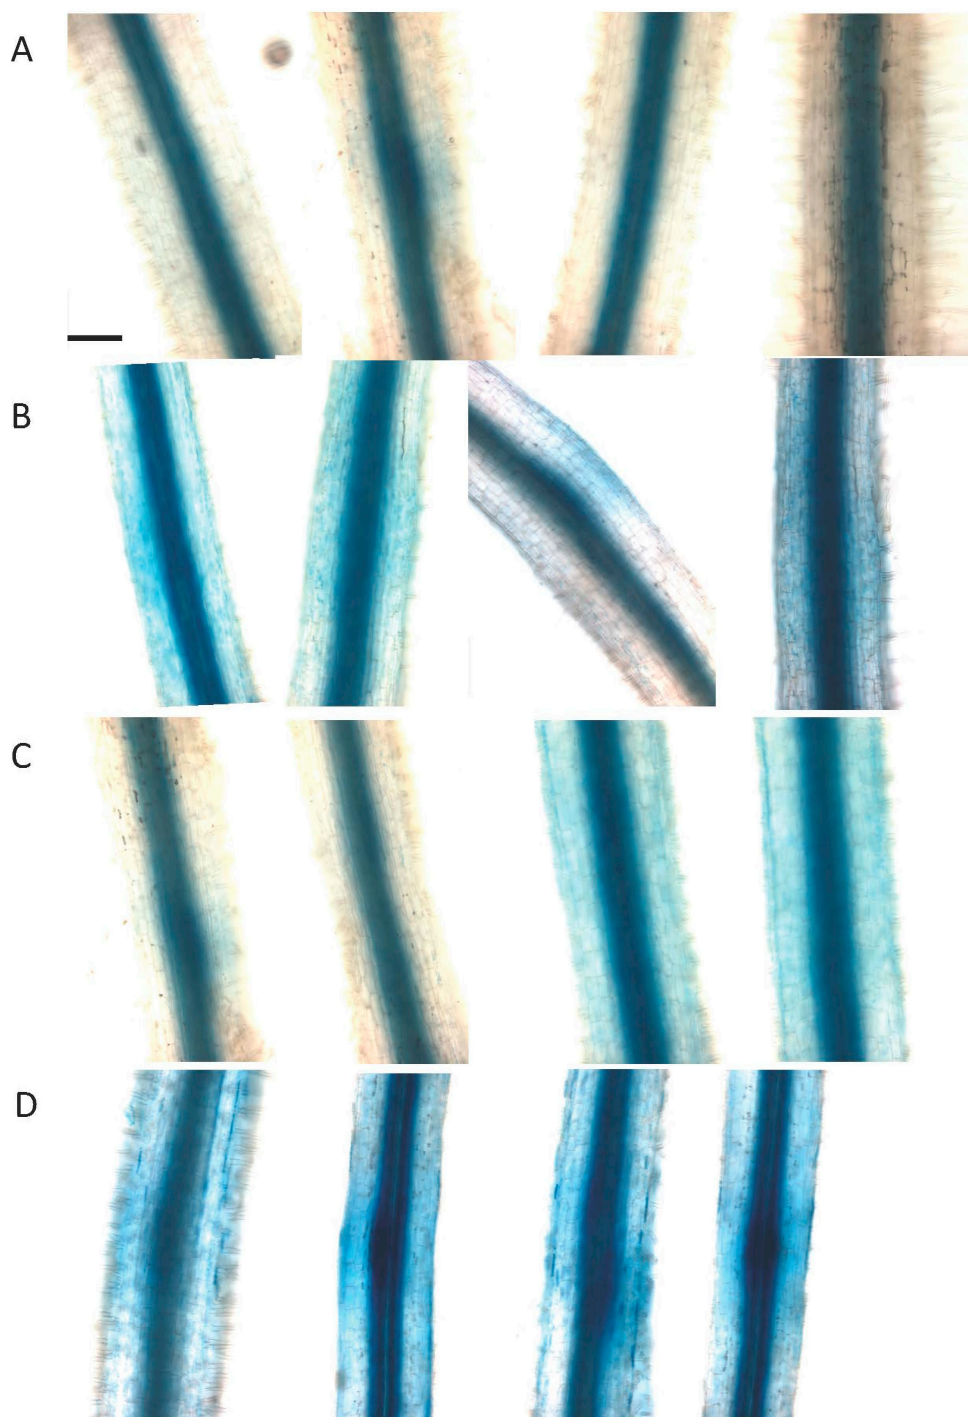

Figure S4. Cont.

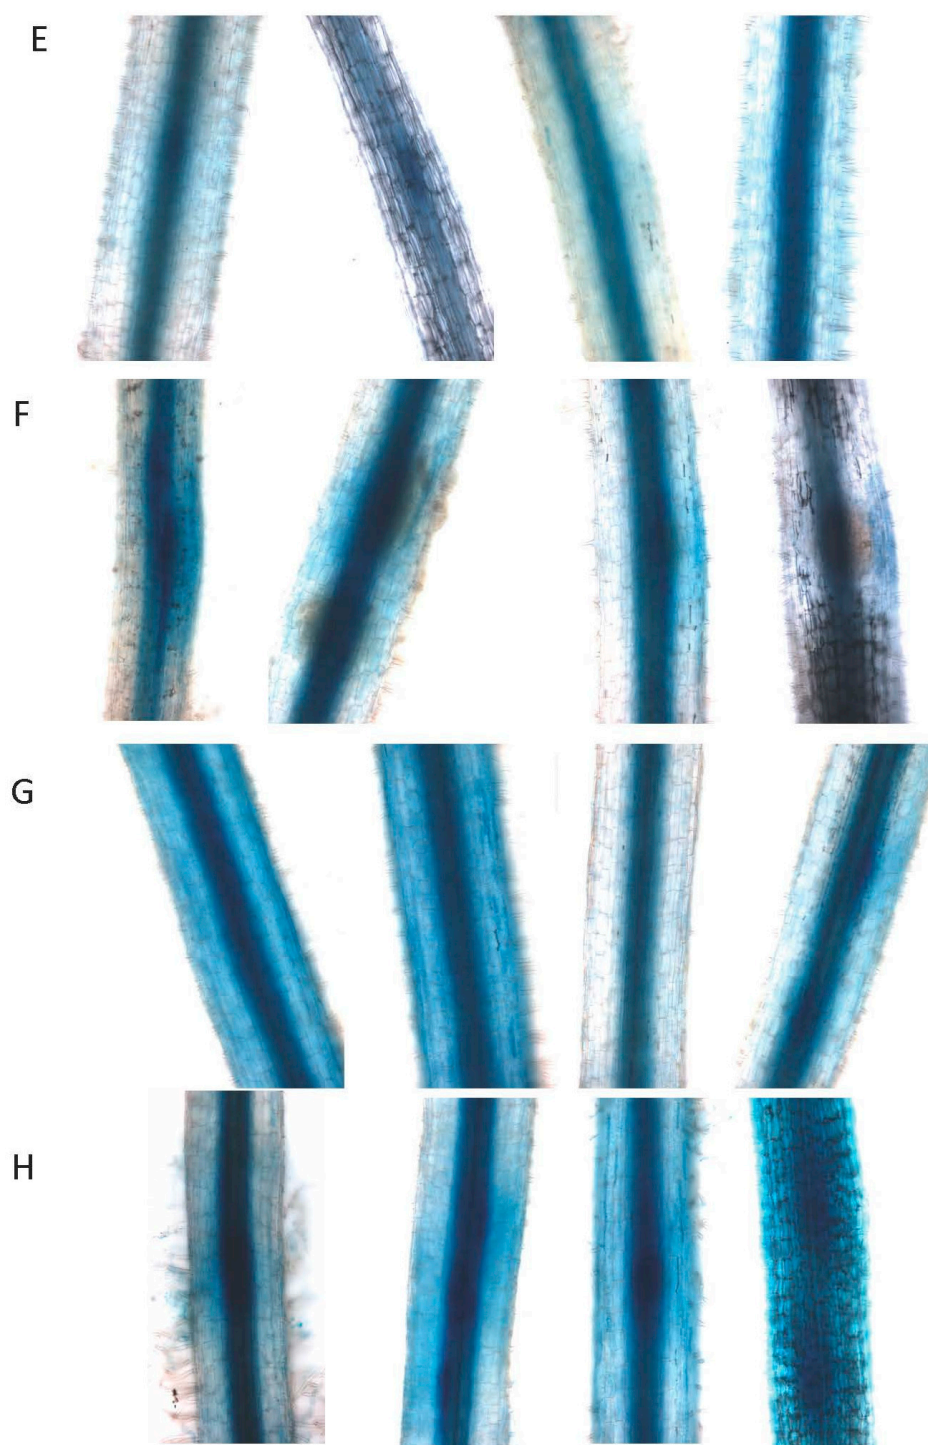

**Figure S4.** *GH3:GUS* staining in response to nitrate and inoculation. The figure shows representative photos of the inoculation site of roots after GUS staining to indicate the possible variation in staining between individual roots. The inoculation site is located in the middle of each segment shown. (A) 24 h p.i. (post inoculation) of no nitrate-treated, uninoculated roots; (B) 24 h p.i. of no nitrate-treated, *S. meliloti*-inoculated roots; (C) 24 h p.i. of 2.5 mM nitrate-treated, uninoculated roots; (D) 24 h p.i. of 2.5 mM nitrate-treated, *S. meliloti*-inoculated roots; (E) 48 h p.i. of no nitrate-treated, uninoculated roots; (F) 48 h p.i. of no nitrate-treated, *S. meliloti*-inoculated roots; (G) 48 h p.i. of 2.5 mM nitrate-treated, uninoculated roots; (H) 48 h p.i. of 2.5 mM nitrate-treated, *S. meliloti*-inoculated roots. Magnification bar (in A) indicates 500  $\mu$ m.

**Table S1.** Summary of protein changes. The table shows the total number of proteins detected and compared across all gels, the number of individual protein spots showing differential display after three way analysis of variance and the number of differentially proteins identified by mass spectrometry. Of the differentially displayed proteins, the number of proteins affected significantly by nitrate (n), inoculation (i), time (t), or interactions of those factors are shown. Many proteins showed significant changes in response to several treatments.

| Feature                                    | Number of Proteins |
|--------------------------------------------|--------------------|
| Number of proteins across all gels         | 1200               |
| Differentially displayed ( $p < 0.05$ )    | 248                |
| Identified differentially displayed        | 106                |
| Proteins affected by nitrate (n)           | 97                 |
| Proteins affected by time (t)              | 96                 |
| Proteins affected by inoculation (i)       | 38                 |
| Proteins affected by $n \times t$          | 27                 |
| Proteins affected by $n \times i$          | 33                 |
| Proteins affected by $i \times t$          | 18                 |
| Proteins affected by $n \times i \times t$ | 22                 |

**Table S2.** Protein identification by mass spectrometry. The table lists all identified proteins and is subdivided into proteins identified by MALDI-TOF (A) and proteins identified by MALDI-TOF/TOF (B).

**Table S3.** Expression patterns of differentially regulated proteins. The table lists all identified, differentially accumulating proteins, and is subdivided into proteins showing a response to inoculation (A), an interaction between inoculation and nitrate treatment (B), nitrate treatment (C), or time point (D). Note that some proteins show significant responses to more than one treatment. The graphs showing the expression patterns were scaled to indicate the relative differences in abundance. Absolute abundances of the same proteins are listed in Table S4.

**Table S3A.** Proteins with a statistically significant ( $p < 0.05$ ) response to nitrate (n), including proteins with a significant interaction between nitrate and time point (nt).

| No. <sup>a</sup> | Identification <sup>b</sup>           | Function <sup>c</sup> | Gene Id <sup>d</sup> | M <sup>e</sup> | E <sup>f</sup> | Expression Pattern <sup>g</sup> |
|------------------|---------------------------------------|-----------------------|----------------------|----------------|----------------|---------------------------------|
| 168              | TCP-1/cpn60 chaperonin family protein | Prot. processing      | Medtr1g017380        | mt             | n, nt          |                                 |
| 234              | Phosphopyruvate hydratase             | Prim. Metab           | Medtr7g103620        | mt             | n              |                                 |
| 236              | F1 ATPase                             | Energy                | Medtr1g108765        | mtt            | n              |                                 |
| 256              | N-acyl-L-amino-acid amidohydrolase    | Prot. processing      | Medtr1g038920        | mt             | nt             |                                 |
| 257              | F1 ATPase                             | Energy                | Medtr1g108765        | mtt            | n, t, nt       |                                 |
| 267              | Monodehydroascorbate reductase        | Defense/stress        | Medtr8g098910        | mt             | n              |                                 |
| 273              | Processing peptidase                  | Prot. processing      | Medtr8g102230        | mt             | n              |                                 |

Table S3A. Cont.

| No. <sup>a</sup> | Identification <sup>b</sup>                                   | Function <sup>c</sup> | Gene Id <sup>d</sup> | M <sup>e</sup> | E <sup>f</sup> | Expression Pattern <sup>g</sup> |
|------------------|---------------------------------------------------------------|-----------------------|----------------------|----------------|----------------|---------------------------------|
| 280              | Tubulin Beta-1 chain                                          | Cell structure        | Medtr3g110720        | mt             | n              |                                 |
| 285              | 2,3-bisphospho-glycerate-independent phosphoglycerate kinase  | Prim. Metab           | Medtr7g074570        | mtt            | n              |                                 |
| 303              | S-adenosyl-L-methionine synthetase                            | Prim. Metab           | Medtr2g046710        | mt             | nt             |                                 |
| 334              | NADP-specific glutamate dehydrogenase                         | Prim. Metab           | Medtr6g029460        | mt             | n              |                                 |
| 401              | ribulose biphosphate carboxylase/oxygenase activase           | Energy                | Medtr3g068030        | mt             | n, t, int      |                                 |
| 417              | Glyceraldehyde-3-phosphate dehydrogenase                      | Prim. Metab           | Medtr3g085850        | mtt            | t, nt          |                                 |
| 430              | Seed linoleate 9S-lipoxygenase                                | Prim. Metab           | Medtr8g018450        | mt             | n              |                                 |
| 442              | TGB12K interacting protein                                    | Unknown               | Medtr3g009280        | mtt            | it, nt, int    |                                 |
| 481              | O-acetylserine (thiol) lyase                                  | Prim. Metab           | Medtr4g087520        | mt             | n              |                                 |
| 495              | pfkB family carbohydrate kinase                               | Prim. Metab           | Medtr2g098950        | mt             | n              |                                 |
| 504              | pfkB family carbohydrate kinase                               | Prim. Metab           | Medtr2g098950        | mtt            | n              |                                 |
| 513              | pfkB family carbohydrate kinase                               | Prim. Metab           | Medtr2g098950        | mt             | n, nt          |                                 |
| 532              | Chalcone reductase/Aldo/keto reductase, family oxidoreductase | Sec. Metab            | Medtr5g097900        | mt             | n, nt          |                                 |
| 565              | Elongation factor 1-beta                                      | Gene regulation       | Medtr4g019610        | mt             | n, t           |                                 |
| 569              | Thylakoid-bound ascorbate peroxidase                          | Defense/stress        | Medtr3g088160        | mt             | nt             |                                 |
| 571              | Thiosulfate/3-mercaptopyruvate sulfurtransferase              | Prim. Metab.          | Medtr2g067080        | mt             | n              |                                 |
| 580              | Seed specific protein Bn15D17A                                | Unknown               | Medtr6g018270        | mt             | n              |                                 |
| 593              | S-formylglutathione hydrolase                                 | Prim. Metab           | Medtr1g052175        | mt             | n, t           |                                 |
| 650              | 26S protease regulatory subunit 6B                            | Prot. processing      | Medtr3g062510        | mt             | n, t           |                                 |

Table S3A. Cont.

| No. <sup>a</sup> | Identification <sup>b</sup>                      | Function <sup>c</sup> | Gene Id <sup>d</sup> | M <sup>e</sup> | E <sup>f</sup> | Expression Pattern <sup>g</sup>                                                       |
|------------------|--------------------------------------------------|-----------------------|----------------------|----------------|----------------|---------------------------------------------------------------------------------------|
| 659              | Metallothionein-like protein type 3              | Defense/stress        | Medtr8g060850        | mt             | n, in          | 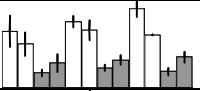   |
| 712              | Glutathione S-transferase                        | Defense/stress        | Medtr2g070150        | mt             | n              |    |
| 780              | Glutathione S-transferase                        | Defense/stress        | Medtr1g115500        | mt             | n, t           |    |
| 783              | Chalcone flavonone isomerase                     | Sec. metab.           | Medtr1g115820        | mt             | n, in, int     |    |
| 787              | NAD(P)H:quinone oxidoreductase, type IV protein  | Prim. Metab           | Medtr2g011080        | mt             | n, t           |    |
| 840              | Kunitz type trypsin inhibitor                    | Prot. processing      | Medtr3g106585        | mtt            | n, nt, int     |    |
| 845              | Kunitz type trypsin inhibitor / Alpha-fucosidase | Prot. processing      | Medtr6g059680        | mt             | n              |    |
| 874              | Kunitz type trypsin inhibitor / Alpha-fucosidase | Prot. processing      | Medtr6g059530        | mtt            | t, nt, int     |    |
| 881              | ABA-responsive protein                           | Defense/stress        | Medtr2g035220        | mtt            | n              |   |
| 908              | ABA-responsive protein                           | Defense/stress        | Medtr2g035220        | mtt            | n, t           |  |
| 925              | Disease-resistance response protein              | Defense/stress        | Medtr2g035120        | mtt            | n, t           |  |
| 929              | ABA-responsive protein                           | Defense/stress        | Medtr2g035190        | mtt            | n, nt          |  |
| 932              | Disease-resistance response protein              | Defense/stress        | Medtr2g035170        | mtt            | n, nt          |  |
| 934              | ABA-responsive protein                           | Defense/stress        | Medtr2g035320        | mtt            | n              |  |
| 935              | ABA-responsive protein                           | Defense/stress        | Medtr2g035320        | mtt            | n, nt          |  |
| 945              | Disease-resistance response protein              | Defense/stress        | Medtr2g035150        | mtt            | n, t, nt       |  |
| 946              | ABA-responsive protein                           | Defense/stress        | Medtr2g035320        | mtt            | n              |  |
| 976              | ABA-responsive protein                           | Defense/stress        | Medtr2g035320        | mtt            | n              |  |
| 1011             | RNA-binding (RRM/RBD/RNP motif) family protein   | Gene regulation       | Medtr3g084040        | mtt            | n              |  |



Table S3A. Cont.

| No. <sup>a</sup> | Identification <sup>b</sup>         | Function <sup>c</sup> | Gene Id <sup>d</sup> | M <sup>e</sup> | E <sup>f</sup> | Expression Pattern <sup>g</sup>                                                     |
|------------------|-------------------------------------|-----------------------|----------------------|----------------|----------------|-------------------------------------------------------------------------------------|
| 1020             | Elongation factor 1-beta            | Gene regulation       | Medtr4g019610        | mt             | n, t           | 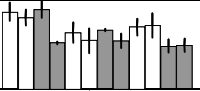 |
| 1026             | Disease-resistance response protein | Defense/stress        | Medtr2g035105        | mtt            | n              |  |
| 1038             | Phosphopyruvate hydratase           | Prim. Metab.          | Medtr7g103620        | mtt            | n              |  |

Table S3B. Proteins with a statistically significant ( $p < 0.05$ ) response to inoculation (i), including proteins with a significant interaction between inoculation and time point (it).

| No. <sup>a</sup> | Identification <sup>b</sup>                                                      | Function <sup>c</sup> | Gene Id <sup>d</sup> | M <sup>e</sup> | E <sup>f</sup> | Expression Pattern <sup>g</sup>                                                       |
|------------------|----------------------------------------------------------------------------------|-----------------------|----------------------|----------------|----------------|---------------------------------------------------------------------------------------|
| 65               | Protein disulfide isomerase-like protein                                         | Prot. processing      | Medtr2g094180        | mtt            | it             | 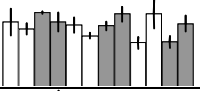   |
| 156              | Protein disulfide-isomerase precursor                                            | Prot. processing      | Medtr3g088220        | mtt            | i, t           |    |
| 306              | Limonoid UDP-glucosyltransferase-like protein/(Iso)flavonoid glycosyltransferase | Sec. Metab            | Medtr1g107285        | mt             | i              |   |
| 336              | NADP-specific glutamate dehydrogenase                                            | Prim. Metab           | Medtr7g085630        | mtt            | it             |  |
| 361              | Actin                                                                            | Cell structure        | Medtr7g026230        | mt             | i              |  |
| 442              | TGB12K interacting protein                                                       | Unknown               | Medtr3g009280        | mtt            | it, nt, int    |  |
| 456              | Zinc-binding dehydrogenase family oxidoreductase                                 | Energy                | Medtr7g034395        | mt             | i, int         |  |
| 457              | Plasma membrane-associated-like protein                                          | Transport             | Medtr2g042430        | mt             | i              |  |
| 491              | Transducin/WD40 repeat protein                                                   | Signalling            | Medtr4g105700        | mt             | i              |  |
| 541              | Isoflavone reductase/Phenylcoumaran benzylic ether reductase-like protein F11    | Sec. Metab            | Medtr5g020740        | mt             | i, t           |  |
| 699              | 20S proteasome subunit alpha                                                     | Prot. processing      | Medtr1g112250        | mtt            | i              |  |
| 741              | RNA-binding (RRM/RBD/RNP motif) family protein                                   | Gene regulation       | Medtr7g013730        | mtt            | i              |  |
| 875              | Pathogenesis-related protein bet V I family protein                              | Defense/stress        | Medtr8g045665        | mt             | i              |  |

Table S3B. Cont.

| No. <sup>a</sup> | Identification <sup>b</sup>                         | Function <sup>c</sup> | Gene Id <sup>d</sup> | M <sup>e</sup> | E <sup>f</sup> | Expression Pattern <sup>g</sup> |
|------------------|-----------------------------------------------------|-----------------------|----------------------|----------------|----------------|---------------------------------|
| 890              | Disease-resistance response protein                 | Defense/stress        | Medtr2g035120        | mtt            | it             |                                 |
| 901              | Pathogenesis-related protein bet V I family protein | Defense/stress        | Medtr8g045640        | mt             | it             |                                 |
| 1040             | Profilin-1,                                         | Cell structure        | Medtr8g102330        | mtt            | it             |                                 |
| 1142             | Acid invertase                                      | Prim. Metab           | Medtr4g101630        | mt             | i, t           |                                 |

**Table S3C.** Proteins with a statistically significant ( $p < 0.05$ ) interaction between inoculation and nitrate (in), including proteins with a significant interaction between inoculation, nitrate and time point (int).

| No. <sup>a</sup> | Identification <sup>b</sup>                          | Function <sup>c</sup> | Gene Id <sup>d</sup> | M <sup>e</sup> | E <sup>f</sup> | Expression pattern <sup>g</sup> |
|------------------|------------------------------------------------------|-----------------------|----------------------|----------------|----------------|---------------------------------|
| 35               | RNA-binding KH domain protein                        | Gene regulation       | TC95861              | mtt            | in             |                                 |
| 238              | UTP-glucose-1-phosphate uridylyltransferase          | Prim. Metab           | Medtr5g077000        | mtt            | t, int         |                                 |
| 249              | Tubulin beta-1 chain                                 | Cell structure        | Medtr4g019110        | mt             | t, int         |                                 |
| 355              | Fructose-bisphosphate aldolase                       | Prim. Metab           | Medtr5g069055        | mtt            | int            |                                 |
| 401              | Ribulose bisphosphate carboxylase/oxygenase activase | Energy                | Medtr3g068030        | mt             | n, t, int      |                                 |
| 414              | Pyruvate dehydrogenase E1 component beta subunit     | Prim. Metab           | Medtr7g005380        | mtt            | int            |                                 |
| 442              | TGB12K interacting protein                           | Unknown               | Medtr3g009280        | mtt            | it, nt, int    |                                 |
| 456              | Zinc-binding dehydrogenase family oxidoreductase     | Energy                | Medtr7g034395        | mt             | i, int         |                                 |
| 488              | Branched-chain-amino-acid aminotransferase           | Prim. Metab           | Medtr5g014960        | mt             | in             |                                 |
| 515              | Isoflavone reductase-like protein Bet protein        | Defense/stress        | Medtr3g111980        | mt             | in             |                                 |
| 567              | 20S proteasome subunit alpha type 1                  | Prot. processing      | Medtr1g022410        | mt             | t, int         |                                 |
| 596              | Papain family cysteine protease                      | Prot. processing      | Medtr1g018840        | mt             | t, int         |                                 |

Table S3C. Cont.

| No. <sup>a</sup> | Identification <sup>b</sup>                               | Function <sup>c</sup> | Gene Id <sup>d</sup> | M <sup>e</sup> | E <sup>f</sup> | Expression Pattern <sup>g</sup> |
|------------------|-----------------------------------------------------------|-----------------------|----------------------|----------------|----------------|---------------------------------|
| 641              | Glutathione S-transferase                                 | Defense/<br>stress    | Medtr1g115500        | mt             | in             |                                 |
| 658              | Caffeoyl-CoA<br>O-methyltransferase                       | Sec. Metab            | Medtr4g085590        | mt             | t, in          |                                 |
| 659              | Metallothionein-like<br>protein type 3                    | Defense/<br>stress    | Medtr8g060850        | mt             | n, in          |                                 |
| 716              | Triosephosphate<br>isomerase                              | Prim. Metab.          | Medtr2g096940        | mt             | in             |                                 |
| 783              | Chalcone-flavanone<br>isomerase family protein            | Sec. Metab.           | Medtr1g115820        | mt             | n, in,<br>int  |                                 |
| 840              | Kunitz type trypsin<br>inhibitor                          | Prot.<br>processing   | Medtr3g106585        | mtt            | n, nt,<br>int  |                                 |
| 874              | Kunitz type trypsin<br>inhibitor/<br>Alpha-fucosidase     | Prot.<br>processing   | Medtr6g059530        | mtt            | t, nt,<br>int  |                                 |
| 898              | Pathogenesis-related<br>protein bet V I family<br>protein | Defense/<br>stress    | Medtr8g045490        | mt             | in             |                                 |
| 922              | Disease-resistance<br>response protein                    | Defense/<br>stress    | Medtr2g035120        | mtt            | t, int         |                                 |

Table S3D. Proteins with a statistically significant ( $p < 0.05$ ) response to the time point (t).

| No. <sup>a</sup> | Identification <sup>b</sup>                 | Function <sup>c</sup> | Gene Id <sup>d</sup> | M <sup>e</sup> | E <sup>f</sup> | Expression Pattern <sup>g</sup> |
|------------------|---------------------------------------------|-----------------------|----------------------|----------------|----------------|---------------------------------|
| 15               | Heat shock protein 70                       | Prot.<br>processing   | Medtr7g099680        | mt             | t              |                                 |
| 37               | RNA-binding KH<br>domain protein            | Gene<br>regulation    | Medtr1g016760        | mtt            | t              |                                 |
| 52               | Heat shock protein 81-2                     | Prot.<br>processing   | Medtr1g016760        | mt             | t              |                                 |
| 61               | BHLH transcription<br>factor                | Gene<br>regulation    | Medtr7g053410        | mt             | t              |                                 |
| 114              | NLI interacting factor-<br>like phosphatase | Transport             | TC109645             | mt             | t              |                                 |
| 123              | Myosin heavy chain                          | Cell structure        | Medtr1g015620        | mt             | t              |                                 |
| 147              | Protein disulfide<br>isomerase              | Prot.<br>processing   | Medtr3g088220        | mtt            | t              |                                 |
| 156              | Protein disulfide<br>isomerase              | Prot.<br>processing   | Medtr3g088220        | mtt            | i, t           |                                 |

Table S3D. Cont.

| No. <sup>a</sup> | Identification <sup>b</sup>                              | Function <sup>c</sup> | Gene Id <sup>d</sup> | M <sup>e</sup> | E <sup>f</sup> | Expression Pattern <sup>g</sup> |
|------------------|----------------------------------------------------------|-----------------------|----------------------|----------------|----------------|---------------------------------|
| 192              | Gutathione reductase                                     | Defense/stress        | Medtr6g033515        | mt             | t              |                                 |
| 238              | UTP-glucose-1-phosphate uridylyltransferase              | Prim. Metab           | Medtr5g077000        | mtt            | t, int         |                                 |
| 249              | Tubulin beta-1 chain                                     | Cell structure        | Medtr4g019110        | mt             | t, int         |                                 |
| 250              | Phosphopyruvate hydratase                                | Prim. Metab           | Medtr7g103620        | mt             | t              |                                 |
| 257              | F1 ATPase                                                | Energy                | Medtr1g108765        | mtt            | n, t, nt       |                                 |
| 309              | S-adenosyl-L-methionine synthetase                       | Prim. Metab           | Medtr7g110310        | mt             | t              |                                 |
| 401              | Ribulose biphosphate carboxylase/oxygenase activase      | Energy                | Medtr3g068030        | mt             | n, t, int      |                                 |
| 408              | Metallothionein-like protein type 3                      | Defense/stress        | Medtr8g060850        | mtt            | t              |                                 |
| 417              | Metallothionein-like protein type 3                      | Defense/stress        | Medtr8g060850        | mtt            | t, nt          |                                 |
| 427              | Fructose-bisphosphate aldolase                           | Prim. Metab           | Medtr5g069055        | mtt            | t              |                                 |
| 541              | Isoflavone reductase                                     | Sec. Metab            | TC100786             | mt             | i, t           |                                 |
| 565              | Translational elongation factor 1                        | Gene regulation       | TC106814             | mt             | n, t           |                                 |
| 567              | 20S proteasome subunit PAF2                              | Prot. processing      | TC107025             | mt             | t, int         |                                 |
| 586              | Phenylcoumaran benzylic ether reductase-like protein Fi1 | Prim. Metab           | Medtr5g020740        | mt             | t              |                                 |
| 593              | S-formylglutathione hydrolase                            | Prim. Metab           | Medtr1g052175.1      | mt             | n, t           |                                 |
| 596              | Papain family cysteine protease                          | Prot. processing      | Medtr1g018840        | mt             | t, int         |                                 |
| 608              | Cyclin                                                   | Cell structure        | Medtr7g089080        | mt             | t              |                                 |
| 615              | Caffeoyl-CoA O-methyltransferase                         | Sec. Metab            | Medtr4g085590        | mtt            | t              |                                 |
| 633              | Hydroxyacylglutathione hydrolase                         | Prim. Metab           | Medtr5g068440        | mt             | t              |                                 |

Table S3D. Cont.

| No. <sup>a</sup> | Identification <sup>b</sup>                        | Function <sup>c</sup> | Gene Id <sup>d</sup> | M <sup>e</sup> | E <sup>f</sup> | Expression Pattern <sup>g</sup> |
|------------------|----------------------------------------------------|-----------------------|----------------------|----------------|----------------|---------------------------------|
| 650              | 26S protease regulatory subunit 6B                 | Prot. processing      | Medtr3g062510        | mt             | n, t           |                                 |
| 658              | Caffeoyl-CoA 3-O-methyltransferase                 | Sec. Metab            | Medtr4g085590        | mt             | t, in          |                                 |
| 780              | Glutathione S-transferase                          | Defense/stress        | Medtr1g115500        | mt             | n, t           |                                 |
| 787              | NAD(P)H:quinone oxidoreductase, type IV protein    | Prim. Metab           | Medtr2g011080        | mt             | n, t           |                                 |
| 819              | ATP synthase D chain                               | Energy                | Medtr1g095830        | mt             | t              |                                 |
| 820              | Oxygen-evolving enhancer protein 2-1               | Energy                | Medtr3g449930        | mt             | t              |                                 |
| 843              | Type II peroxiredoxin                              | Defense/stress        | Medtr2g022660        | mt             | t              |                                 |
| 874              | Kunitz type trypsin inhibitor / Alpha-fucosidase   | Prot. processing      | Medtr6g059530        | mtt            | t, nt, int     |                                 |
| 896              | Polyketide cyclase/dehydrase and lipid transporter | Defense/stress        | Medtr8g045300        | mt             | t              |                                 |
| 905              | Disease-resistance response protein                | Defense/stress        | Medtr2g035120        | mtt            | t              |                                 |
| 908              | ABA-responsive protein                             | Defense/stress        | Medtr2g035220        | mtt            | n, t           |                                 |
| 922              | Disease-resistance response protein                | Defense/stress        | Medtr2g035120        | mtt            | t, int         |                                 |
| 925              | Disease-resistance response protein                | Defense/stress        | Medtr2g035120        | mtt            | n, t           |                                 |
| 945              | Disease-resistance response protein                | Defense/stress        | Medtr2g035150        | mtt            | n, t, nt       |                                 |
| 951              | STIG1                                              | Unknown               | Medtr4g044463        | mt             | t              |                                 |
| 958              | RNA-binding (RRM/RBD/RNP motif) family protein     | Gene regulation       | Medtr4g070080        | mtt            | t              |                                 |
| 970              | Ubiquitin-conjugating enzyme                       | Prot. processing      | Medtr2g078010        | mtt            | t              |                                 |
| 978              | Polyketide cyclase/dehydrase and lipid transporter | Defense/stress        | Medtr1g030820        | mt             | t              |                                 |
| 1020             | Elongation factor 1-beta                           | Gene regulation       | Medtr4g019610        | mt             | n, t           |                                 |

Table S3D. Cont.

| No. <sup>a</sup> | Identification <sup>b</sup>                                 | Function <sup>c</sup> | Gene Id <sup>d</sup> | M <sup>e</sup> | E <sup>f</sup> | Expression Pattern <sup>g</sup> |
|------------------|-------------------------------------------------------------|-----------------------|----------------------|----------------|----------------|---------------------------------|
| 1057             | Type II peroxiredoxin                                       | Defense/ stress       | Medtr6g087990        | mt             | t              |                                 |
| 1076             | 2,3-bisphosphoglycerate-independent phosphoglycerate mutase | Prim. Metab           | Medtr7g074570        | mt             | t              |                                 |
| 1129             | Glutathione-S-transferase                                   | Defense/ stress       | Medtr1g067180        | mt             | t              |                                 |
| 1142             | Acid invertase                                              | Prim. Metab           | Medtr4g101630        | mt             | i,t            |                                 |

<sup>a</sup> 'No' refers to the identification number used throughout this study, and corresponds to the numbers shown in Supplement Figure 3; <sup>b</sup> 'Identification' shows the annotation of the in the *M. truncatula* genome 4.0v1 index; <sup>c</sup> 'Function' indicated the likely functional classification of the annotated protein in the cell, according to Bevan et al. (1998). Prim. Metab. = primary metabolism; Sec. Metab. = secondary metabolism; Prot. Processing = protein processing; <sup>d</sup> 'Gene ID' refers to the Locus Id in the *M. truncatula* genome 4.0v1 index; <sup>e</sup> 'M' indicated the method of identification by mass spectrometry as either MALDI-TOF (mt) or MALDI-TOF/TOF (mtt); <sup>f</sup> 'E' indicates the statistically significant effects from either the nitrate treatment (n), inoculation with *S. meliloti* (i), time point (t), or interactions of these treatments. The effects were established from three way analyses of variance using the restricted maximum likely hood method (REML); <sup>g</sup> 'Expression pattern' shows the means of protein abundance as % volume of each protein on a gel. Each bar represents the mean of abundance of the three biological repeats, error bars indicate standard error. White bars are from treatments without nitrate, grey bars are from treatments with 2.5 mM nitrate. From left to right the bars represent the following treatments: 24 h control no nitrate, 24 h inoculated no nitrate, 24 h control 2.5 mM nitrate, 24 h inoculated 2.5 mM nitrate, 48 h control no nitrate, 48 h inoculated no nitrate, 48 h control 2.5 mM nitrate, 48 h inoculated 2.5 mM nitrate, 5 days control no nitrate, 5 days inoculated no nitrate, 5 days control 2.5 mM nitrate, 5 days inoculated 2.5 mM nitrate.

Table S4. Relative protein abundance of the 106 identified proteins
